# Supplementary material
Source: PubMed Central journal article supplement (PMC4004317)
Supplement: nn406252h_si_001.pdf [file nn406252h_si_001.pdf]

## Supporting Information

# A Step Closer to Membrane Protein Multiplexed Nano-Arrays Using Biotin-Doped Polypyrrole

*Eduardo Antonio Della Pia<sup>†</sup>, Jeppe V. Holm\*, Noemie Lloret<sup>†</sup>, Christel Le Bon<sup>‡</sup>, Jean-Luc Popot<sup>‡</sup>, Manuela Zoonens<sup>‡</sup>, Jesper Nygård\*, Karen Laurence Martinez<sup>†</sup>*

<sup>†</sup>Bio-Nanotechnology Laboratory, Department of Neuroscience and Pharmacology & Nano-Science Center, University of Copenhagen, Universitetsparken 5, DK-2100 Copenhagen, Denmark

\* Niels Bohr Institute, Center for Quantum Devices & Nano-Science Center, University of Copenhagen, Universitetsparken 5, DK-2100, Copenhagen, Denmark

<sup>‡</sup>UMR 7099, CNRS/Université Paris-7, Institut de Biologie Physico-Chimique, 13 rue Pierre et Marie Curie, F-75005 Paris, France

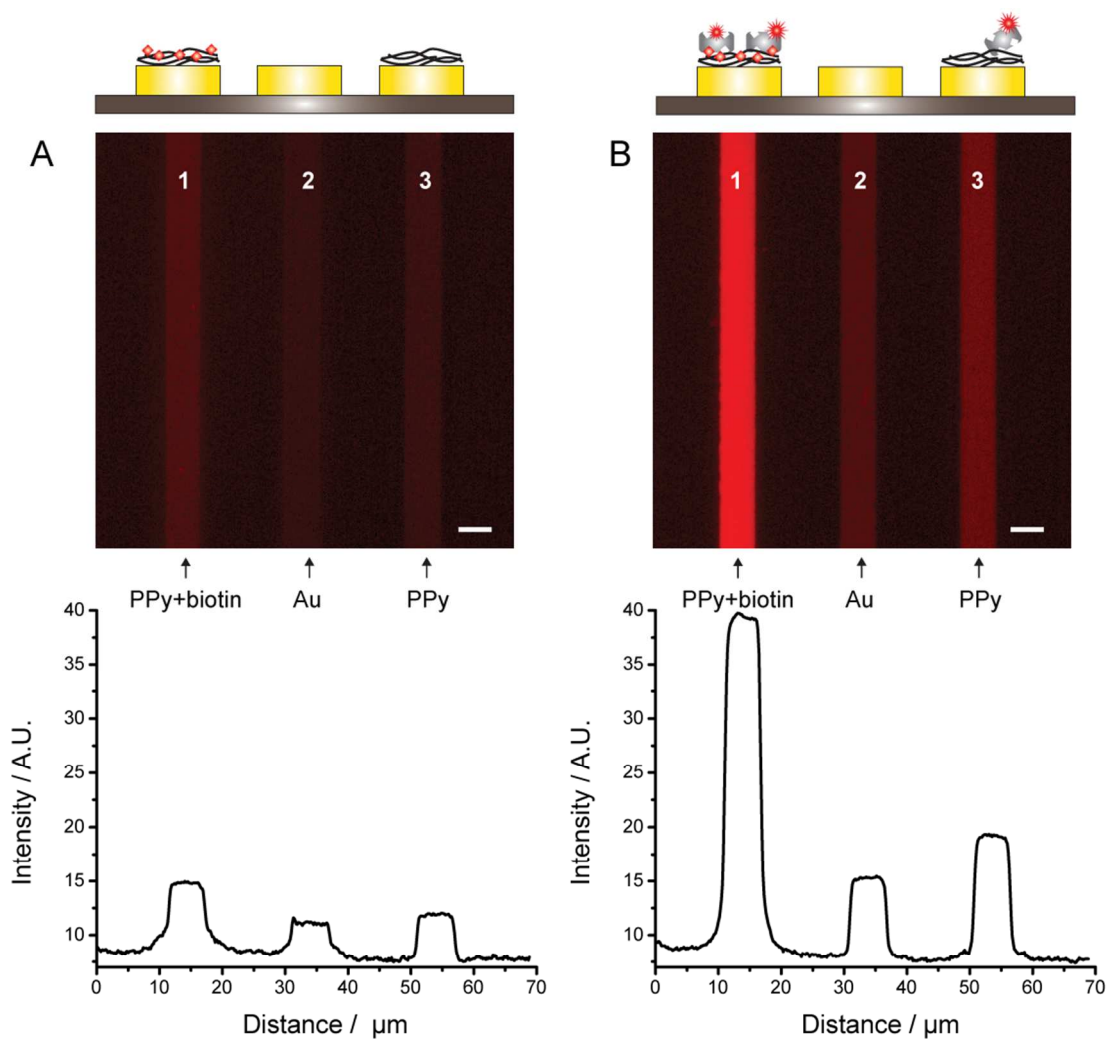

**Supporting Figure 1.** Immobilization of SA on PPy-biotin surfaces. Fluorescence images and line profiles of electrodes modified with either a PPy-biotin (1) or a PPy film (3) before (A) and after (B) incubation with 1  $\mu\text{M}$  SA-647. Electrode 2 is bare gold. Scale bar is 5  $\mu\text{m}$ .

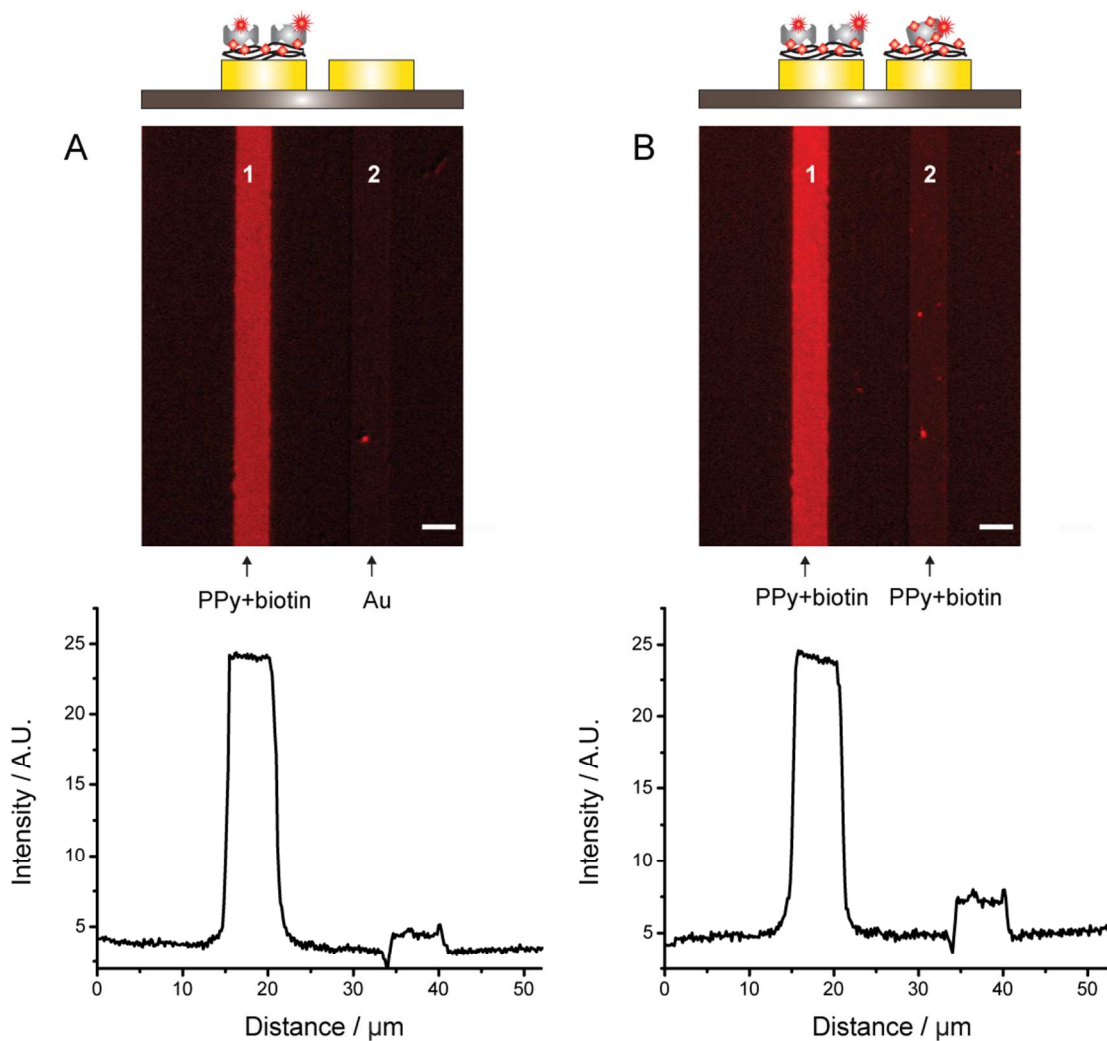

**Supporting Figure 2.** Non-specific binding of SA to PPy-biotin surfaces. (A) Fluorescence image and line profile of an electrode modified with PPy-biotin (1) and a bare gold electrode (2) after 30 min of incubation with 1  $\mu\text{M}$  SA-647. (B) Electrode 2 was modified with a PPy-biotin film and the chip incubated for 30 min with 1  $\mu\text{M}$  SA-647 pre-incubated with an excess of biotin for 1 h. Scale bar is 5  $\mu\text{m}$ .

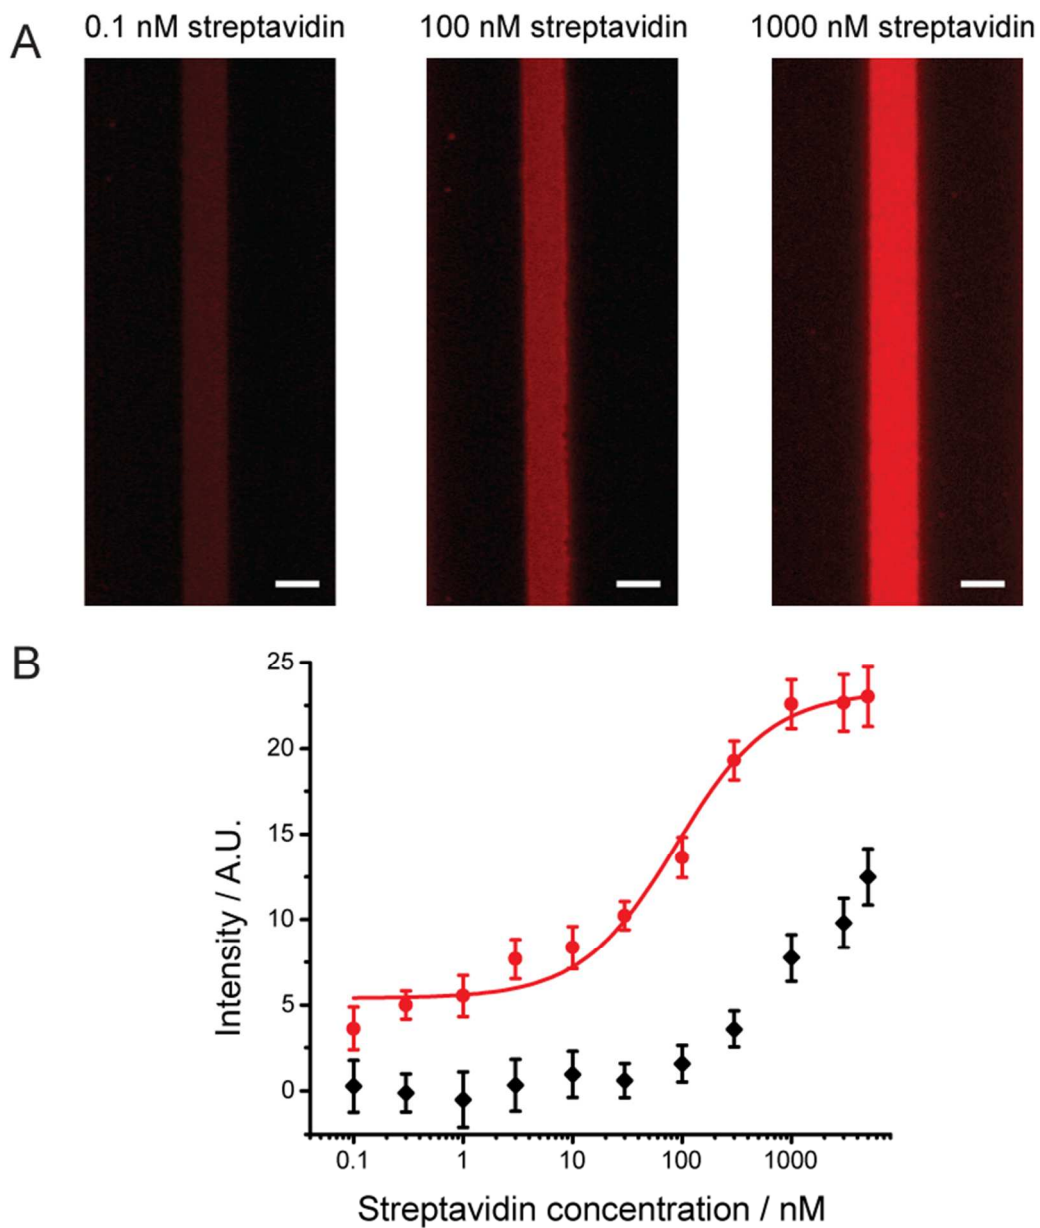

**Supporting Figure 3.** Binding curve of SA to PPy-biotin film. (A) Fluorescence images of an electrode modified with PPy-biotin after incubation with 0.1 nM, 100 nM and 1000 nM SA-647. Scale bar is 5  $\mu\text{m}$ . (B) Binding curve of SA-647 to electrodes modified with either a PPy-biotin film (red dots) or a PPy film (black diamonds). Fitting the experimental data to Hill's equation (red line) yields  $K_D = 88 \pm 12$  nM.

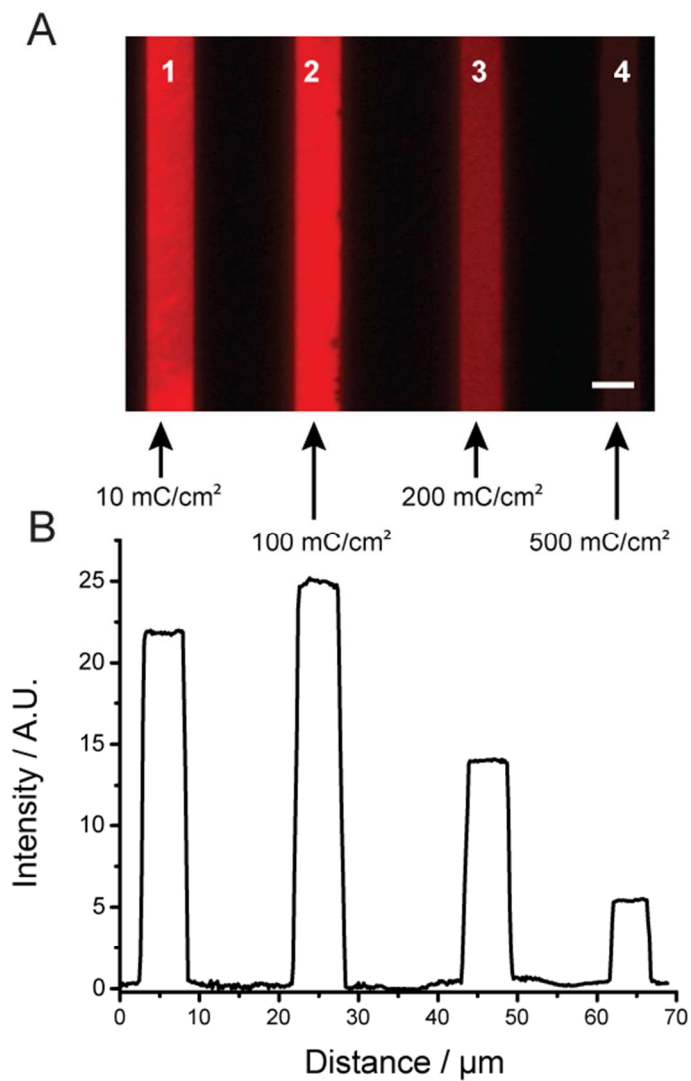

**Supporting Figure 4.** Control of the binding of SA to PPy-biotin surfaces. Fluorescence image of four electrodes modified with PPy-biotin films after incubation with 1  $\mu\text{M}$  SA-647. The total charge deposited on the different electrodes is: 10  $\text{mC}/\text{cm}^2$  (electrode 1), 100  $\text{mC}/\text{cm}^2$  (electrode 2), 200  $\text{mC}/\text{cm}^2$  (electrode 3) and 500  $\text{mC}/\text{cm}^2$  (electrode 4). Scale bar is 5  $\mu\text{m}$ .

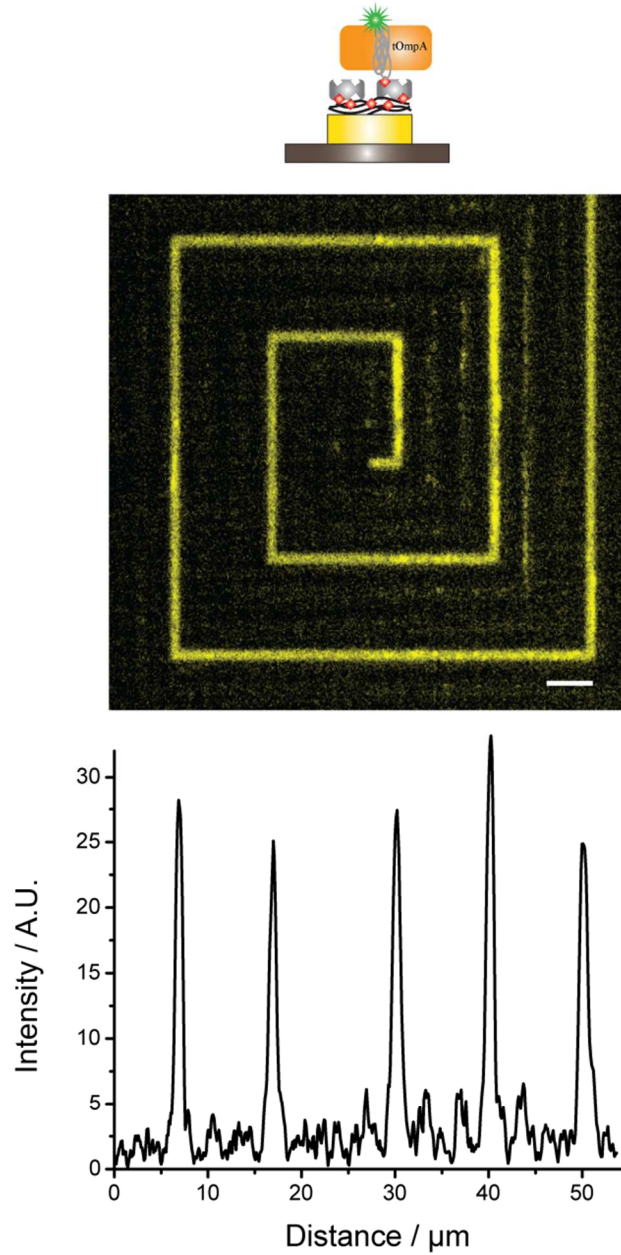

**Supporting Figure 5.** Functionalization of nano-surfaces with MPs. Fluorescence image of a 200 nm-thick electrode after functionalization with a PPy-biotin film, incubation for 30 min with 1  $\mu\text{M}$  SA and for 30 min with 1  $\mu\text{M}$  tOmpA trapped in BAPol/FAPol<sub>NBD</sub>. Scale bar is 5  $\mu\text{m}$ . The line scale was evaluated across the center of the figure.
